# Supplementary material
Source: MDPI journal article supplement (https://www.mdpi.com/1424-8247/16/1/127)
Supplement: s1 [file s1]

## SUPPORTING INFORMATION

# SIRT2i\_Predictor: A Machine Learning-Based Tool to Facilitate the Discovery of Novel SIRT2 Inhibitors

Nemanja Djokovic <sup>1,\*</sup>, Minna Rahnasto-Rilla <sup>2</sup>, Nikolaos Lougiakis <sup>3</sup>, Maija Lahtela-Kakkonen <sup>2</sup> and Katarina Nikolic <sup>1,\*</sup>

- <sup>1.</sup> Department of Pharmaceutical Chemistry, Faculty of Pharmacy, University of Belgrade, Vojvode Stepe 450, 11221 Belgrade, Serbia
  - <sup>2.</sup> School of Pharmacy, University of Eastern Finland, P.O. Box 1627, 70210 Kuopio, Finland
  - <sup>3.</sup> Laboratory of Medicinal Chemistry, Section of Pharmaceutical Chemistry, Department of Pharmacy, School of Health Sciences, National and Kapodistrian University of Athens, Panepistimiopolis-Zografou, 15771 Athens, Greece
- \* Correspondence: nemanja.djokovic@pharmacy.bg.ac.rs (N.D.); katarina.nikolic@pharmacy.bg.ac.rs (K.N.)

### Table of Contents

|                                                              |    |
|--------------------------------------------------------------|----|
| Table S1 .....                                               | 1  |
| Table S2 .....                                               | 3  |
| Table S4 .....                                               | 7  |
| Table S5 .....                                               | 9  |
| Table S6 .....                                               | 10 |
| Table S7 .....                                               | 12 |
| Table S8 .....                                               | 13 |
| Table S9 .....                                               | 14 |
| Table S10 .....                                              | 15 |
| Table S11 .....                                              | 16 |
| Table S12 .....                                              | 17 |
| Supplementary Note S1 – Internal validation parameters ..... | 18 |
| Supplementary Note S2 - Supplementary methods .....          | 18 |

**Table S1.** List of hyperparameters, their values and objectives considered for optimization through Bayesian search.

| Model       | ML algorithm | Tuned hyperparameters                                                                                                                                                                                                                                                                                                                                                                                                                                     |
|-------------|--------------|-----------------------------------------------------------------------------------------------------------------------------------------------------------------------------------------------------------------------------------------------------------------------------------------------------------------------------------------------------------------------------------------------------------------------------------------------------------|
| Regression  | RF           | {'bootstrap': [True, False], 'max_depth': [5, 20, 35, 50, 65, 80, None], 'max_features': ['log2', 'sqrt'], 'min_samples_leaf': [2, 4, 6], 'min_samples_split': [2, 5, 10], 'n_estimators': [250, 500, 750, 1000, 1250, 1500]}, scoring : ( ' r2' )                                                                                                                                                                                                        |
|             | SVR          | {'C': [0.01, 0.1, 1, 10, 100, 200, 400, 1000], 'gamma': [100, 10, 1, 1e-1, 1e-2, 1e-3], 'kernel': ['rbf', 'linear']}, scoring : ( ' r2' )                                                                                                                                                                                                                                                                                                                 |
|             | XGBoost      | {'learning_rate': [0.01, 0.1], 'max_depth': [3, 6, 10], 'min_child_weight': [1, 3, 5], 'gamma': [0, 1, 5], 'subsample': [0.6, 0.7, 0.8, 0.9, 1.0], 'colsample_bytree': [0.5, 0.6, 0.7, 0.8, 0.9, 1.0], 'n_estimators': [500, 1500]}, scoring : ( ' r2' )                                                                                                                                                                                                  |
|             | KNN          | {'n_neighbors': [5, 9, 15, 19, 25, 35, 45, 55, 71], 'weights': ['distance'], 'p': [1, 2], 'metric': ['jaccard', 'dice', 'rogerstanimoto']}, scoring : ( ' r2' )                                                                                                                                                                                                                                                                                           |
|             | DNN          | {number of Dense layers: (1-8, activation = 'relu'; None in output layer), number of neurons in each layer: ((100 - 5000), step = (50 - 1000)), added dropouts: ((0 - 0.5), step = 0.1), SGD optimizer learning rate: (1e-4 to 1e-2, sampling = 'log', default = 1e-3), loss_fn : 'MeanSquaredError', batch_size : (32-128, step = 32, default = 64), objective : ('val_mean_squared_error', 'min'), used 30 % of training set as validation set }        |
| Binary      | RF           | {'bootstrap': [True, False], 'max_depth': [5, 20, 35, 50, 65, 80, None], 'max_features': ['log2', 'sqrt'], 'min_samples_leaf': [2, 4, 6], 'min_samples_split': [2, 5, 10], 'n_estimators': [250, 500, 750, 1000, 1250, 1500]}, scoring : ( ' balanced_accuracy' )                                                                                                                                                                                         |
|             | SVC          | {'C': [0.01, 0.1, 1, 10, 100, 200, 400, 1000], 'gamma': [100, 10, 1, 1e-1, 1e-2, 1e-3], 'kernel': ['linear', 'rbf']}, scoring : ( ' balanced_accuracy' )                                                                                                                                                                                                                                                                                                  |
|             | XGBoost      | {'learning_rate': [0.01, 0.1], 'max_depth': [3, 6, 10], 'min_child_weight': [1, 3, 5], 'gamma': [0, 1, 5], 'subsample': [0.6, 0.7, 0.8, 0.9, 1.0], 'colsample_bytree': [0.5, 0.6, 0.7, 0.8, 0.9, 1.0], 'n_estimators': [500, 1500]}, scoring : ( ' balanced_accuracy' )                                                                                                                                                                                   |
|             | KNN          | {'n_neighbors': [5, 9, 15, 19, 25, 35, 45, 55, 71], 'weights': ['distance'], 'p': [1, 2], 'metric': ['jaccard', 'dice', 'rogerstanimoto']}, scoring : ( ' balanced_accuracy' )                                                                                                                                                                                                                                                                            |
|             | DNN          | {number of Dense layers: (1-8, (activation = 'relu'; 'sigmoid' in output layer)), number of neurons in each layer: ((100 - 5000), step = (50 - 1000)), added dropouts: ((0-0.5), step = 0.1), Adam optimizer learning rate: ((1e-4 to 1e-2), sampling = 'log', default = 1e-3), loss_fn : 'BinaryCrossentropy', batch_size : (32-128, step = 32, default = 64), objective : ('val_binary_accuracy', 'max'), used 30 % of training set as validation set } |
| Multi-class | RF           | {'bootstrap': [True, False], 'max_depth': [5, 20, 35, 50, 65, 80, None], 'max_features': ['log2', 'sqrt'], 'min_samples_leaf': [2, 4, 6], 'min_samples_split': [2, 5, 10], 'n_estimators': [250, 500, 750, 1000, 1250, 1500]}, scoring : ( ' balanced_accuracy' )                                                                                                                                                                                         |

|  |                |                                                                                                                                                                                                                                                                                                                                                                                                                                                                              |
|--|----------------|------------------------------------------------------------------------------------------------------------------------------------------------------------------------------------------------------------------------------------------------------------------------------------------------------------------------------------------------------------------------------------------------------------------------------------------------------------------------------|
|  | <b>SVC</b>     | {'C': [0.01, 0.1, 1, 10, 100, 200, 400, 1000], 'gamma': [100,10,1,1e-1,1e-2, 1e-3], 'kernel': ['linear', 'rbf']], scoring : ( 'balanced_accuracy')                                                                                                                                                                                                                                                                                                                           |
|  | <b>XGBoost</b> | {'learning_rate': [0.01, 0.1], 'max_depth': [3, 6, 10], 'min_child_weight': [1, 3, 5], 'gamma': [0, 1, 5], 'subsample': [0.6, 0.7, 0.8, 0.9, 1.0], 'colsample_bytree': [0.5, 0.6, 0.7, 0.8, 0.9, 1.0], 'n_estimators': [500, 1500]}, scoring : ( 'balanced_accuracy')                                                                                                                                                                                                        |
|  | <b>KNN</b>     | {'n_neighbors': [5,9,15,19,25,35,45,55,71], 'weights': ['distance'],'p': [1,2],'metric': ['jaccard', 'dice', 'rogerstanimoto']}, scoring : ( 'balanced_accuracy')                                                                                                                                                                                                                                                                                                            |
|  | <b>DNN</b>     | {number of Dense layers: ((1-8), activation = ('relu'; 'softmax' in outplut layer)), number of neurons in each layer: ((100 - 5000), step = (50 - 1000)), added dropouts: (0 -0.5, step = 0.1), Adam optimizer learning rate: (1e-4 to 1e-2, sampling = ('log', default = 1e-3)), loss_fn : 'SparseCategoricalCrossentropy', batch_size : ((32-128), step = 32, default = 64), objective : ( 'val_categorical_accuracy','max'), used 30 % of training set as validation set} |

**Table S2.** Optimized hyperparameters for final models included in SIRT2i\_Predictor.

| Final model                                    | Optimized hyperparameters                                                                                                                                                                                                                                                                                                                                                                                                                                                                                                                           |
|------------------------------------------------|-----------------------------------------------------------------------------------------------------------------------------------------------------------------------------------------------------------------------------------------------------------------------------------------------------------------------------------------------------------------------------------------------------------------------------------------------------------------------------------------------------------------------------------------------------|
| Regression<br>XGBoost:ECFP4                    | [('colsample_bytree', 0.5), ('gamma', 0), ('learning_rate', 0.01), ('max_depth', 10), ('min_child_weight', 3), ('n_estimators', 1500), ('subsample', 0.6)]                                                                                                                                                                                                                                                                                                                                                                                          |
| Binary RF:ECFP4                                | [('bootstrap', False), ('max_depth', 65), ('max_features', 'sqrt'), ('min_samples_leaf', 2), ('min_samples_split', 5), ('n_estimators', 1000)]                                                                                                                                                                                                                                                                                                                                                                                                      |
| Multiclass SIRT1/2<br>RF:ECFP4                 | [('bootstrap', False), ('max_depth', 80), ('max_features', 'sqrt'), ('min_samples_leaf', 2), ('min_samples_split', 5), ('n_estimators', 750)]                                                                                                                                                                                                                                                                                                                                                                                                       |
| Multiclass SIRT2/3<br>DNN:descriptors<br>model | InputLayer : 'config': {'batch_input_shape': (None, 316), 'units': 4000, 'activation': 'relu'}<br>Dense Layer 1 : 'config': {'name': 'dense_1', 'units': 100, 'activation': 'relu'}<br>Dropout Layer : 'config': {'name': 'dropout', 'rate': 0.0}<br>Dense Layer 2 : 'config': {'name': 'dense_2', 'units': 3, 'activation': 'softmax'}<br>Optimizer: {'name': 'Adam', 'learning_rate': 1e-04, 'decay': 0.0, 'beta_1': 0.9, 'beta_2': 0.999, 'epsilon': 1e-07, 'amsgrad': False}<br>batch_size = 32<br>Loss function: SparseCategoricalCrossentropy |

**Table S3.** Mordred descriptors selected after feature selection procedure.

| Model Type                          | List of selected Mordred descriptors                                                                                                                                                                                                                                                                                                                                                                                                                                                                                                                                                                                                                     |
|-------------------------------------|----------------------------------------------------------------------------------------------------------------------------------------------------------------------------------------------------------------------------------------------------------------------------------------------------------------------------------------------------------------------------------------------------------------------------------------------------------------------------------------------------------------------------------------------------------------------------------------------------------------------------------------------------------|
| <b>Regression models</b>            | nAromAtom, ATS0Z, AATS5d, AATS6v, AATS4i, AATS5i, ATSC7dv, ATSC6d, ATSC8d, ATSC7Z, ATSC1v, ATSC2v, ATSC1se, ATSC2i, ATSC4i, ATSC8i, AATSC2dv, AATSC5dv, AATSC0d, AATSC3se, AATSC5se, MATS1p, MATS6p, GATS4dv, GATS6d, GATS4Z, GATS3v, GATS5v, GATS6se, GATS4i, GATS5i, C1SP2, Xc-5d, AXp-1d, NaaS, SaasC, IC2, IC3, PEOE_VSA3, PEOE_VSA8, PEOE_VSA12, SMR_VSA6, SlogP_VSA10, EState_VSA2, VSA_EState1, n10FRing, SLogP, JGI2, JGI6, JGI8, JGI9, TopoShapelIndex                                                                                                                                                                                          |
| <b>Binary classification models</b> | AATS0dv, AATS1dv, AATS0d, AATS5d, AATS6d, AATS0Z, AATS1Z, AATS5Z, AATS6Z, AATS0v, AATS5v, AATS6v, AATS0se, AATS5se, AATS6se, AATS0i, AATS3i, AATS4i, AATS5i, AATS6i, ATSC1dv, ATSC2dv, ATSC3dv, ATSC4dv, ATSC5dv, ATSC6dv, ATSC7dv, ATSC8dv, ATSC1d, ATSC2d, ATSC3d, ATSC4d, ATSC5d, ATSC6d, ATSC7d, ATSC8d, ATSC1Z, ATSC2Z, ATSC3Z, ATSC4Z, ATSC5Z, ATSC6Z, ATSC7Z, ATSC8Z, ATSC1v, ATSC2v, ATSC3v, ATSC4v, ATSC5v, ATSC6v, ATSC7v, ATSC8v, ATSC0se, ATSC1se, ATSC2se, ATSC3se, ATSC4se, ATSC5se, ATSC6se, ATSC7se, ATSC8se, ATSC1i, ATSC2i, ATSC3i, ATSC4i, ATSC5i, ATSC6i, ATSC7i, ATSC8i, AATSC1dv, AATSC2dv, AATSC4dv, AATSC5dv, AATSC6dv, AATSC0d, |

|                                                         |                                                                                                                                                                                                                                                                                                                                                                                                                                                                                                                                                                                                                                                                                                                                                                                                                                                                                                                                                                                                                                                                                                                                                                                                                                                                                                                                                                                                                                                                                                                                                                                                                                                                                    |
|---------------------------------------------------------|------------------------------------------------------------------------------------------------------------------------------------------------------------------------------------------------------------------------------------------------------------------------------------------------------------------------------------------------------------------------------------------------------------------------------------------------------------------------------------------------------------------------------------------------------------------------------------------------------------------------------------------------------------------------------------------------------------------------------------------------------------------------------------------------------------------------------------------------------------------------------------------------------------------------------------------------------------------------------------------------------------------------------------------------------------------------------------------------------------------------------------------------------------------------------------------------------------------------------------------------------------------------------------------------------------------------------------------------------------------------------------------------------------------------------------------------------------------------------------------------------------------------------------------------------------------------------------------------------------------------------------------------------------------------------------|
|                                                         | AATSC1d, AATSC2d, AATSC5d, AATSC6d, AATSC5Z, AATSC6Z, AATSC0v, AATSC1v, AATSC6v, AATSC0se, AATSC2se, AATSC3se, AATSC4se, AATSC6se, AATSC1pe, AATSC0i, MATS5Z, MATS1p, MATS4p, MATS6p, GATS1dv, GATS2dv, GATS3dv, GATS5dv, GATS1d, GATS2d, GATS4d, GATS5d, GATS6d, GATS5Z, GATS6Z, GATS2v, GATS6v, GATS1se, GATS2se, GATS4se, GATS5se, GATS6se, GATS1p, GATS2p, GATS3p, GATS6i, BalabanJ, Xc-6dv, Xpc-4d, Xpc-4dv, AXp-1d, AXp-0dv, AXp-1dv, NsCH3, NdCH2, NtCH, NdsCH, NaaCH, NsssCH, NdssC, NaasC, NaaaC, NssssC, NsNH2, NdNH, NssNH, NaaNH, NdsN, NaaN, NsssN, NddsN, NaasN, NsOH, NssO, NaaO, NsSH, NdS, NssS, NaaS, NddssS, NdSe, SssCH2, SsssCH, SdssC, SaasC, SssssC, ECIndex, fragCpx, fMF, nHBAcc, nHBDOn, IC0, IC1, IC2, IC3, SIC0, SIC1, SIC2, SIC3, MIC0, MIC1, ZMIC1, Lipinski, GhoseFilter, FilterItLogS, PEOE_VSA2, PEOE_VSA3, PEOE_VSA4, PEOE_VSA5, PEOE_VSA6, PEOE_VSA7, PEOE_VSA8, PEOE_VSA9, PEOE_VSA10, PEOE_VSA11, PEOE_VSA12, PEOE_VSA13, SMR_VSA2, SMR_VSA3, SMR_VSA4, SMR_VSA6, SMR_VSA9, SlogP_VSA3, SlogP_VSA4, SlogP_VSA8, SlogP_VSA10, EState_VSA2, EState_VSA3, EState_VSA4, EState_VSA5, EState_VSA6, EState_VSA7, EState_VSA8, EState_VSA9, VSA_EState1, VSA_EState2, VSA_EState3, VSA_EState5, VSA_EState8, VSA_EState9, MDEC-23, MDEC-33, nRing, n7Ring, nG12Ring, nFRing, n8FRing, n9FRing, nFHRing, nG12FaRing, nFaHRing, n9FARing, n10FARing, SLogP, JGI1, JGI2, JGI3, JGI4, JGI5, JGI6, JGI7, JGI8                                                                                                                                                                                                                                             |
| <b>Multiclass<br/>Classification<br/>Models SIRT1/2</b> | nAromAtom, nSpiro, nBridgehead, nHetero, nN, nO, nS, nP, nF, nCl, nBr, nI, nX, ATS0Z, AATS0dv, AATS0d, AATS5d, AATS6d, AATS0Z, AATS1Z, AATS5Z, AATS6Z, AATS4v, AATS5v, AATS6v, AATS0se, AATS5se, AATS6se, AATS0p, AATS0i, AATS3i, AATS4i, AATS5i, AATS6i, ATSC1dv, ATSC2dv, ATSC3dv, ATSC4dv, ATSC5dv, ATSC6dv, ATSC7dv, ATSC8dv, ATSC1d, ATSC2d, ATSC3d, ATSC4d, ATSC5d, ATSC6d, ATSC7d, ATSC8d, ATSC1Z, ATSC2Z, ATSC3Z, ATSC4Z, ATSC5Z, ATSC6Z, ATSC7Z, ATSC8Z, ATSC1v, ATSC2v, ATSC3v, ATSC4v, ATSC5v, ATSC6v, ATSC7v, ATSC8v, ATSC1se, ATSC2se, ATSC3se, ATSC4se, ATSC5se, ATSC6se, ATSC7se, ATSC8se, ATSC1p, ATSC3p, ATSC4p, ATSC5p, ATSC6p, ATSC7p, ATSC8p, ATSC1i, ATSC2i, ATSC3i, ATSC4i, ATSC5i, ATSC6i, ATSC7i, ATSC8i, AATSC0dv, AATSC1dv, AATSC2dv, AATSC3dv, AATSC4dv, AATSC5dv, AATSC6dv, AATSC0d, AATSC1d, AATSC2d, AATSC5d, AATSC6d, AATSC5Z, AATSC6Z, AATSC0v, AATSC1v, AATSC2v, AATSC6v, AATSC1se, AATSC2se, AATSC3se, AATSC4se, AATSC5se, AATSC6se, AATSC0p, AATSC2p, AATSC6p, AATSC2i, MATS4Z, GATS1dv, GATS4dv, GATS3d, GATS4Z, GATS5Z, GATS2v, GATS6v, GATS1se, GATS2se, GATS3se, GATS4se, GATS5se, GATS1p, GATS2p, GATS4p, GATS5p, GATS6i, Xch-6d, Xch-5dv, Xc-3d, Xc-4d, Xc-5d, Xc-6d, Xc-3dv, Xc-4dv, Xc-5dv, Xc-6dv, Xpc-4d, Xpc-4dv, AXp-1d, AXp-0dv, AXp-1dv, NsCH3, NdCH2, NtCH, NdsCH, NaaCH, NsssCH, NaasC, NaaaC, NssssC, NsNH2, NdNH, NssNH, NaaNH, NdsN, NaaN, NsssN, NddsN, NaasN, NsOH, NssO, NaaO, NsSH, NdS, NssS, NaaS, NddssS, NdSe, SssCH2, SdssC, SaasC, SssssC, ECIndex, fragCpx, fMF, nHBDOn, IC0, IC1, IC2, IC3, SIC0, SIC1, SIC2, SIC3, MIC0, MIC1, Lipinski, GhoseFilter, FilterItLogS, PEOE_VSA2, PEOE_VSA3, PEOE_VSA4, PEOE_VSA5, |

|                                                         |                                                                                                                                                                                                                                                                                                                                                                                                                                                                                                                                                                                                                                                                                                                                                                                                                                                                                                                                                                                                                                                                                                                                                                                                                                                                                                                                                                                                                                                                                                                                                                                                                                                                                                                                                                                                                                                                                                                                                                                                                                                                                                                                                                                                                                                                                                                                             |
|---------------------------------------------------------|---------------------------------------------------------------------------------------------------------------------------------------------------------------------------------------------------------------------------------------------------------------------------------------------------------------------------------------------------------------------------------------------------------------------------------------------------------------------------------------------------------------------------------------------------------------------------------------------------------------------------------------------------------------------------------------------------------------------------------------------------------------------------------------------------------------------------------------------------------------------------------------------------------------------------------------------------------------------------------------------------------------------------------------------------------------------------------------------------------------------------------------------------------------------------------------------------------------------------------------------------------------------------------------------------------------------------------------------------------------------------------------------------------------------------------------------------------------------------------------------------------------------------------------------------------------------------------------------------------------------------------------------------------------------------------------------------------------------------------------------------------------------------------------------------------------------------------------------------------------------------------------------------------------------------------------------------------------------------------------------------------------------------------------------------------------------------------------------------------------------------------------------------------------------------------------------------------------------------------------------------------------------------------------------------------------------------------------------|
|                                                         | PEOE_VSA6, PEOE_VSA7, PEOE_VSA8, PEOE_VSA9, PEOE_VSA10, PEOE_VSA11, PEOE_VSA12, PEOE_VSA13, SMR_VSA2, SMR_VSA3, SMR_VSA4, SMR_VSA6, SMR_VSA9, SlogP_VSA3, SlogP_VSA4, SlogP_VSA8, SlogP_VSA10, SlogP_VSA11, EState_VSA2, EState_VSA3, EState_VSA4, EState_VSA6, EState_VSA7, EState_VSA8, EState_VSA9, VSA_EState1, VSA_EState3, VSA_EState5, VSA_EState7, VSA_EState8, VSA_EState9, MDEC-23, MDEC-33, piPC3, nRing, n7Ring, n8Ring, nG12Ring, nHRing, naHRing, n6aHRing, nARing, nAHRing, n6AHRing, nFRing, n9FRing, nG12FRing, nFHRing, n10FHRing, nFaRing, n9FaRing, n10FaRing, nG12FaRing, nFARing, n9FARing, n10FARing, nFAHRing, n9FAHRing, n10FAHRing, RotRatio, SLogP, JGI1, JGI2, JGI3, JGI4, JGI5, JGI6, JGI7                                                                                                                                                                                                                                                                                                                                                                                                                                                                                                                                                                                                                                                                                                                                                                                                                                                                                                                                                                                                                                                                                                                                                                                                                                                                                                                                                                                                                                                                                                                                                                                                                     |
| <b>Multiclass<br/>Classification<br/>Models SIRT2/3</b> | AATS0dv, AATS5d, AATS6d, AATS0Z, AATS1Z, AATS6Z, AATS5v, AATS6v, AATS0se, AATS5se, AATS6se, AATS0p, AATS4p, AATS5p, AATS6p, AATS0i, AATS1i, AATS3i, AATS4i, AATS5i, AATS6i, ATSC2c, ATSC3c, ATSC5c, ATSC6c, ATSC7c, ATSC8c, ATSC1dv, ATSC2dv, ATSC3dv, ATSC4dv, ATSC5dv, ATSC6dv, ATSC7dv, ATSC8dv, ATSC1d, ATSC2d, ATSC3d, ATSC4d, ATSC5d, ATSC6d, ATSC7d, ATSC8d, ATSC1Z, ATSC2Z, ATSC3Z, ATSC4Z, ATSC5Z, ATSC6Z, ATSC7Z, ATSC8Z, ATSC1v, ATSC2v, ATSC3v, ATSC4v, ATSC5v, ATSC6v, ATSC7v, ATSC8v, ATSC1se, ATSC2se, ATSC3se, ATSC4se, ATSC5se, ATSC6se, ATSC7se, ATSC8se, ATSC1pe, ATSC1p, ATSC3p, ATSC4p, ATSC5p, ATSC6p, ATSC7p, ATSC8p, ATSC1i, ATSC2i, ATSC3i, ATSC4i, ATSC5i, ATSC6i, ATSC7i, ATSC8i, AATSC0c, AATSC1c, AATSC2c, AATSC3c, AATSC4c, AATSC5c, AATSC6c, AATSC1dv, AATSC2dv, AATSC3dv, AATSC4dv, AATSC5dv, AATSC6dv, AATSC0d, AATSC1d, AATSC2d, AATSC4d, AATSC5d, AATSC6d, AATSC3Z, AATSC5Z, AATSC6Z, AATSC0v, AATSC1v, AATSC2v, AATSC6v, AATSC1se, AATSC2se, AATSC3se, AATSC4se, AATSC5se, AATSC6se, AATSC1pe, AATSC0p, AATSC1p, AATSC6p, AATSC2i, AATSC6i, MATS1c, MATS3Z, MATS4Z, MATS5Z, MATS6Z, MATS2se, GATS2c, GATS3c, GATS4c, GATS5c, GATS6c, GATS1dv, GATS2dv, GATS3dv, GATS4dv, GATS5dv, GATS6dv, GATS1d, GATS2d, GATS3d, GATS4d, GATS5d, GATS6d, GATS1Z, GATS2Z, GATS3Z, GATS4Z, GATS5Z, GATS6Z, GATS2v, GATS6v, GATS1se, GATS2se, GATS3se, GATS4se, GATS5se, GATS6se, GATS1p, GATS2p, GATS4p, GATS6p, GATS1i, GATS3i, GATS4i, GATS6i, BalabanJ, nBondsD, nBondsT, nBondsKD, RNCG, RPCG, C1SP1, C2SP1, C1SP2, C2SP2, C3SP2, C1SP3, C3SP3, C4SP3, Xch-3d, Xch-4d, Xch-5d, Xch-6d, Xch-6dv, Xc-3d, Xc-4d, Xc-5d, Xc-6d, Xc-3dv, Xc-4dv, Xc-5dv, Xc-6dv, AXp-1d, AXp-0dv, NsCH3, NtCH, NdsCH, NaaCH, NaasC, NaaaC, NssssC, NsNH2, NdNH, NaaNH, NdsN, NaaN, NssssN, NddsN, NaasN, NsOH, NssO, NaaO, NsSH, NdS, NssS, NaaS, NddssS, SssCH2, SaasC, SssssC, ECIndex, fragCpx, fMF, IC0, IC1, IC2, IC3, SIC0, SIC1, SIC3, MIC0, MIC1, Lipinski, GhoseFilter, FilterItLogS, PEOE_VSA2, PEOE_VSA3, PEOE_VSA4, PEOE_VSA5, PEOE_VSA6, PEOE_VSA7, PEOE_VSA8, PEOE_VSA9, PEOE_VSA10, PEOE_VSA11, PEOE_VSA13, SMR_VSA2, SMR_VSA4, SMR_VSA6, SMR_VSA9, SlogP_VSA3, SlogP_VSA4, SlogP_VSA8, SlogP_VSA10, SlogP_VSA11, EState_VSA2, EState_VSA3, EState_VSA4, EState_VSA5, EState_VSA6, EState_VSA7, EState_VSA8, EState_VSA9, |

|  |                                                                                                                                                                                                                                                                                                                                                                                                                                                                                                                |
|--|----------------------------------------------------------------------------------------------------------------------------------------------------------------------------------------------------------------------------------------------------------------------------------------------------------------------------------------------------------------------------------------------------------------------------------------------------------------------------------------------------------------|
|  | VSA_EState1, VSA_EState3, VSA_EState7, VSA_EState8, MDEC-22,<br>MDEC-23, MDEC-33, piPC3, nRing, n4Ring, n6Ring, n7Ring, nG12Ring,<br>nHRing, n6HRing, naHRing, n6aHRing, nARing, n5ARing, n6ARing,<br>nAHRing, n5AHRing, n6AHRing, nFRing, n8FRing, n9FRing, n10FRing,<br>nG12FRing, nFHRing, n10FHRing, n9FaRing, n10FaRing, n10FaHRing,<br>nFARing, n9FARing, n10FARing, nFAHRing, n9FAHRing, n10FAHRing,<br>RotRatio, SLogP, JGI1, JGI2, JGI3, JGI4, JGI5, JGI6, JGI7, JGI8, JGI9,<br>JGI10, TopoShapeIndex |
|--|----------------------------------------------------------------------------------------------------------------------------------------------------------------------------------------------------------------------------------------------------------------------------------------------------------------------------------------------------------------------------------------------------------------------------------------------------------------------------------------------------------------|

**Table S4.** Results of internal (train set (int) and cross validation (CV)) and external (ext) validation for regression models.

| ML<br>algorithm | Molecular<br>feature | $R^2_{\text{int}}$ | $\text{RMSE}_{\text{int}}$ | $Q^2$         | $\text{RMSE}_{\text{cv}}$ | $R^2_{\text{ext}}$ | $\text{RMSE}_{\text{ext}}$ | $r^2_m$ | $\bar{r}^2_m$ | $\Delta r^2_m$ | $Q^2_{F1}$ | $Q^2_{F2}$ | $Q^2_{F3}$ | CCC  | Criteria 1 <sup>a</sup> | Criteria 2 <sup>b</sup> | Criteria 3 <sup>c</sup> | k (or k') <sup>d</sup> |
|-----------------|----------------------|--------------------|----------------------------|---------------|---------------------------|--------------------|----------------------------|---------|---------------|----------------|------------|------------|------------|------|-------------------------|-------------------------|-------------------------|------------------------|
| RF              | descriptors          | 0.99               | 0.11                       | 0.7 +/- 0.02  | 0.55 +/- 0.01             | 0.7                | 0.55                       | 0.7     | 0.52          | 0.27           | 0.7        | 0.7        | 0.7        | 0.81 | 0.008                   | 0.300                   | 0.206                   | 1.000<br>(0.990)       |
|                 | ECFP4                | 0.9                | 0.31                       | 0.74 +/- 0.03 | 0.5 +/- 0.03              | 0.75               | 0.5                        | 0.75    | 0.6           | 0.23           | 0.75       | 0.75       | 0.75       | 0.85 | 0.004                   | 0.170                   | 0.125                   | 1.001<br>(0.991)       |
|                 | MACCS                | 0.86               | 0.37                       | 0.68 +/- 0.03 | 0.56 +/- 0.03             | 0.71               | 0.53                       | 0.71    | 0.55          | 0.26           | 0.71       | 0.71       | 0.71       | 0.82 | 0.005                   | 0.243                   | 0.171                   | 1.001<br>(0.991)       |
|                 | ECFP6                | 0.93               | 0.26                       | 0.75 +/- 0.03 | 0.49 +/- 0.03             | 0.77               | 0.48                       | 0.77    | 0.62          | 0.21           | 0.77       | 0.77       | 0.76       | 0.86 | 0.003                   | 0.139                   | 0.104                   | 1.001<br>(0.992)       |
| SVM             | descriptors          | 0.99               | 0.11                       | 0.63 +/- 0.03 | 0.6 +/- 0.03              | 0.62               | 0.61                       | 0.63    | 0.44          | 0.31           | 0.62       | 0.62       | 0.62       | 0.77 | 0.004                   | 0.074                   | 0.052                   | 1.003<br>(0.989)       |
|                 | ECFP4                | 0.98               | 0.15                       | 0.74 +/- 0.03 | 0.51 +/- 0.03             | 0.74               | 0.51                       | 0.74    | 0.63          | 0.13           | 0.74       | 0.74       | 0.73       | 0.84 | 0.004                   | 0.476                   | 0.296                   | 0.997<br>(0.992)       |
|                 | MACCS                | 0.96               | 0.21                       | 0.66 +/- 0.05 | 0.57 +/- 0.04             | 0.68               | 0.57                       | 0.68    | 0.55          | 0.21           | 0.68       | 0.68       | 0.68       | 0.81 | 0.001                   | 0.173                   | 0.116                   | 1.002<br>(0.988)       |
|                 | ECFP6                | 0.99               | 0.11                       | 0.75 +/- 0.03 | 0.5 +/- 0.03              | 0.74               | 0.51                       | 0.74    | 0.63          | 0.18           | 0.74       | 0.74       | 0.74       | 0.86 | 0.001                   | 0.098                   | 0.072                   | 0.997<br>(0.995)       |
| XGBoost         | descriptors          | 0.99               | 0.09                       | 0.7 +/- 0.02  | 0.55 +/- 0.01             | 0.67               | 0.58                       | 0.66    | 0.53          | 0.25           | 0.68       | 0.68       | 0.68       | 0.82 | 0.001                   | 0.089                   | 0.065                   | 0.999<br>(0.993)       |
|                 | ECFP4 <sup>*</sup>   | 0.97               | 0.17                       | 0.74 +/- 0.02 | 0.5 +/- 0.02              | 0.79               | 0.46                       | 0.79    | 0.7           | 0.17           | 0.74       | 0.74       | 0.74       | 0.86 | 9.06E-05                | 0.064                   | 0.050                   | 1.005<br>(0.998)       |
|                 | MACCS                | 0.87               | 0.35                       | 0.69 +/- 0.04 | 0.55 +/- 0.03             | 0.71               | 0.53                       | 0.71    | 0.58          | 0.24           | 0.7        | 0.7        | 0.7        | 0.82 | 0.000                   | 0.176                   | 0.124                   | 1.001<br>(0.990)       |
|                 | ECFP6                | 0.99               | 0.1                        | 0.73 +/- 0.02 | 0.52 +/- 0.02             | 0.73               | 0.52                       | 0.73    | 0.62          | 0.2            | 0.73       | 0.73       | 0.73       | 0.87 | 0.000                   | 0.115                   | 0.084                   | 0.993<br>(0.999)       |
| KNN             | descriptors          | 1                  | 0.05                       | 0.65 +/- 0.06 | 0.59 +/- 0.06             | 0.68               | 0.56                       | 0.68    | 0.56          | 0.23           | 0.68       | 0.68       | 0.68       | 0.86 | 0.004                   | 0.068                   | 0.048                   | 0.995<br>(0.997)       |
|                 | ECFP4                | 1                  | 0.07                       | 0.7 +/- 0.04  | 0.54 +/- 0.04             | 0.74               | 0.51                       | 0.75    | 0.64          | 0.13           | 0.74       | 0.74       | 0.74       | 0.87 | 0.000                   | 0.180                   | 0.123                   | 0.986<br>(1.004)       |
|                 | MACCS                | 0.97               | 0.17                       | 0.6 +/- 0.07  | 0.63 +/- 0.05             | 0.6                | 0.63                       | 0.6     | 0.47          | 0.16           | 0.6        | 0.6        | 0.6        | 0.79 | 0.014                   | 0.216                   | 0.123                   | 0.991<br>(0.996)       |
|                 | ECFP6                | 1                  | 0.06                       | 0.72 +/- 0.04 | 0.53 +/- 0.04             | 0.76               | 0.49                       | 0.76    | 0.66          | 0.12           | 0.76       | 0.76       | 0.76       | 0.87 | 0.003                   | 0.057                   | 0.041                   | 0.999<br>(0.993)       |
| DNN             | descriptors          | 0.98               | 0.16                       | 0.79 +/- 0.07 | 0.45 +/- 0.06             | 0.66               | 0.58                       | 0.68    | 0.57          | 0.03           | 0.66       | 0.66       | 0.66       | 0.81 | 0.032                   | 0.053                   | 0.015                   | 1.005<br>(0.985)       |
|                 | ECFP4                | 0.99               | 0.09                       | 0.85 +/- 0.07 | 0.37 +/- 0.07             | 0.74               | 0.51                       | 0.74    | 0.63          | 0.18           | 0.73       | 0.73       | 0.73       | 0.84 | 0.000                   | 0.108                   | 0.079                   | 1.002<br>(0.989)       |
|                 | MACCS                | 0.93               | 0.27                       | 0.64 +/- 0.07 | 0.59 +/- 0.05             | 0.68               | 0.56                       | 0.69    | 0.56          | 0.16           | 0.68       | 0.68       | 0.67       | 0.80 | 0.007                   | 0.123                   | 0.079                   | 1.004<br>(0.985)       |
|                 | ECFP6                | 0.96               | 0.19                       | 0.82 +/- 0.05 | 0.41 +/- 0.07             | 0.73               | 0.52                       | 0.74    | 0.63          | 0.17           | 0.73       | 0.73       | 0.73       | 0.81 | 0.048                   | 0.571                   | 0.380                   | 1.170<br>(0.832)       |

\* Final model statistics

<sup>a</sup>  $(R^2 - R_0^2) / R^2 < 0.1$

<sup>b</sup>  $(R^2 - R_0'^2) / R^2 < 0.1$

<sup>c</sup>  $|R^2 - R_0'^2| < 0.3$

<sup>d</sup>  $0.85 \leq k \text{ (or } k') \leq 1.15$

**Table S5.** Results of internal (train set (int) and cross validation (CV)) validation for binary classification models.

| ML algorithm | Molecular feature | BA <sub>int</sub> | MCC <sub>int</sub> | ROC_AUC <sub>int</sub> | BA <sub>cv</sub> | MCC <sub>cv</sub> | ROC_AUC <sub>cv</sub> |
|--------------|-------------------|-------------------|--------------------|------------------------|------------------|-------------------|-----------------------|
| RF           | ECFP4             | 0.95              | 0.89               | 0.99                   | 0.80 +/- 0.04    | 0.60 +/- 0.04     | 0.90 +/- 0.02         |
|              | MACCS2            | 0.93              | 0.84               | 0.98                   | 0.79 +/- 0.03    | 0.60 +/- 0.03     | 0.88 +/- 0.02         |
|              | descriptors       | 1                 | 1                  | 1                      | 0.81 +/- 0.02    | 0.63 +/- 0.02     | 0.90 +/- 0.02         |
|              | ECFP6             | 0.97              | 0.93               | 1                      | 0.80 +/- 0.04    | 0.62 +/- 0.04     | 0.90 +/- 0.02         |
| SVC          | ECFP4             | 1                 | 0.99               | 1                      | 0.78 +/- 0.04    | 0.59 +/- 0.04     | 0.87 +/- 0.03         |
|              | MACCS2            | 0.96              | 0.91               | 0.98                   | 0.77 +/- 0.02    | 0.56 +/- 0.02     | 0.84 +/- 0.02         |
|              | descriptors       | 1                 | 1                  | 1                      | 0.80 +/- 0.03    | 0.61 +/- 0.03     | 0.87 +/- 0.02         |
|              | ECFP6             | 1                 | 1                  | 1                      | 0.67 +/- 0.03    | 0.44 +/- 0.03     | 0.87 +/- 0.02         |
| XGBoost      | ECFP4             | 0.99              | 0.99               | 1                      | 0.77 +/- 0.03    | 0.55 +/- 0.03     | 0.88 +/- 0.02         |
|              | MACCS2            | 0.93              | 0.84               | 0.98                   | 0.77 +/- 0.02    | 0.56 +/- 0.02     | 0.87 +/- 0.01         |
|              | descriptors       | 1                 | 1                  | 1                      | 0.80 +/- 0.02    | 0.61 +/- 0.02     | 0.89 +/- 0.01         |
|              | ECFP6             | 1                 | 1                  | 1                      | 0.79 +/- 0.03    | 0.58 +/- 0.03     | 0.88 +/- 0.02         |
| KNN          | ECFP4             | 1                 | 0.99               | 1                      | 0.79 +/- 0.03    | 0.59 +/- 0.03     | 0.87 +/- 0.03         |
|              | MACCS2            | 0.96              | 0.92               | 1                      | 0.77 +/- 0.02    | 0.55 +/- 0.02     | 0.84 +/- 0.01         |
|              | descriptors       | 1                 | 1                  | 1                      | 0.64 +/- 0.03    | 0.34 +/- 0.03     | 0.82 +/- 0.03         |
|              | ECFP6             | 1                 | 1                  | 1                      | 0.80 +/- 0.03    | 0.61 +/- 0.03     | 0.88 +/- 0.03         |
| DNN          | ECFP4             | 1                 | 0.99               | 1                      | 0.8 +/- 0.05     | 0.61 +/- 0.05     | 0.89 +/- 0.02         |
|              | MACCS2            | 0.96              | 0.9                | 1                      | 0.81 +/- 0.03    | 0.63 +/- 0.03     | 0.9 +/- 0.01          |
|              | descriptors       | 1                 | 1                  | 1                      | 0.84 +/- 0.01    | 0.69 +/- 0.01     | 0.91 +/- 0.01         |
|              | ECFP6             | 0.98              | 0.96               | 1                      | 0.82 +/- 0.02    | 0.64 +/- 0.02     | 0.91 +/- 0.02         |

**Table S6.** Results of internal (train set (int) and cross validation (CV)) validation for multiclass classification models.

| Model   | ML algorithm | Molecular feature | BA <sub>int</sub> | MCC <sub>int</sub> | ROC_AUC <sub>int</sub> | BA <sub>cv</sub> | MCC <sub>cv</sub> | ROC_AUC <sub>cv</sub> |
|---------|--------------|-------------------|-------------------|--------------------|------------------------|------------------|-------------------|-----------------------|
| SIRT1/2 | RF           | ECFP4             | 0.93              | 0.89               | 0.99                   | 0.74 +/- 0.02    | 0.63 +/- 0.02     | 0.9 +/- 0.01          |
|         |              | MACCS2            | 0.9               | 0.85               | 0.99                   | 0.73 +/- 0.03    | 0.62 +/- 0.03     | 0.89 +/- 0.01         |
|         |              | descriptors       | 1                 | 1                  | 1                      | 0.75 +/- 0.03    | 0.63 +/- 0.03     | 0.9 +/- 0.01          |
|         |              | ECFP6             | 0.94              | 0.91               | 1                      | 0.75 +/- 0.02    | 0.64 +/- 0.02     | 0.9 +/- 0.01          |
|         | SVC          | ECFP4             | 0.97              | 0.95               | 1                      | 0.75 +/- 0.03    | 0.64 +/- 0.03     | 0.89 +/- 0.01         |
|         |              | MACCS2            | 0.97              | 0.94               | 0.99                   | 0.72 +/- 0.03    | 0.6 +/- 0.03      | 0.86 +/- 0.01         |
|         |              | descriptors       | 1                 | 0.99               | 1                      | 0.73 +/- 0.05    | 0.61 +/- 0.05     | 0.88 +/- 0.02         |
|         |              | ECFP6             | 1                 | 1                  | 1                      | 0.75 +/- 0.03    | 0.64 +/- 0.03     | 0.89 +/- 0.01         |
|         | XGBoost      | ECFP4             | 0.99              | 0.99               | 1                      | 0.75 +/- 0.02    | 0.64 +/- 0.02     | 0.9 +/- 0.01          |
|         |              | MACCS2            | 0.92              | 0.88               | 0.99                   | 0.74 +/- 0.01    | 0.63 +/- 0.01     | 0.9 +/- 0.01          |
|         |              | descriptors       | 1                 | 1                  | 1                      | 0.75 +/- 0.02    | 0.64 +/- 0.02     | 0.89 +/- 0.01         |
|         |              | ECFP6             | 0.9               | 0.84               | 0.98                   | 0.74 +/- 0.01    | 0.63 +/- 0.01     | 0.9 +/- 0.01          |
|         | KNN          | ECFP4             | 1                 | 1                  | 1                      | 0.72 +/- 0.01    | 0.59 +/- 0.01     | 0.88 +/- 0.01         |
|         |              | MACCS2            | 0.97              | 0.95               | 1                      | 0.69 +/- 0.03    | 0.56 +/- 0.03     | 0.86 +/- 0.02         |
|         |              | descriptors       | 0.85              | 0.76               | 0.96                   | 0.67 +/- 0.03    | 0.54 +/- 0.03     | 0.86 +/- 0.01         |
|         |              | ECFP6             | 1                 | 1                  | 1                      | 0.71 +/- 0.02    | 0.58 +/- 0.02     | 0.89 +/- 0.01         |
|         | DNN          | ECFP4             | 1                 | 1                  | 1                      | 0.75 +/- 0.03    | 0.63 +/- 0.02     | 0.9 +/- 0.02          |
|         |              | MACCS2            | 0.95              | 0.92               | 1                      | 0.74 +/- 0.01    | 0.61 +/- 0.05     | 0.89 +/- 0.01         |
|         |              | descriptors       | 0.99              | 0.99               | 1                      | 0.75 +/- 0.03    | 0.64 +/- 0.02     | 0.9 +/- 0.01          |
|         |              | ECFP6             | 0.98              | 0.99               | 1                      | 0.75 +/- 0.03    | 0.63 +/- 0.01     | 0.9 +/- 0.01          |
| SIRT2/3 | RF           | ECFP4             | 0.94              | 0.9                | 1                      | 0.8 +/- 0.03     | 0.74 +/- 0.03     | 0.95 +/- 0.02         |
|         |              | MACCS2            | 0.94              | 0.89               | 0.99                   | 0.78 +/- 0.01    | 0.72 +/- 0.01     | 0.93 +/- 0.02         |
|         |              | descriptors       | 1                 | 1                  | 1                      | 0.8 +/- 0.03     | 0.74 +/- 0.03     | 0.94 +/- 0.02         |
|         |              | ECFP6             | 0.96              | 0.93               | 1                      | 0.81 +/- 0.03    | 0.76 +/- 0.03     | 0.95 +/- 0.02         |
|         | SVC          | ECFP4             | 1                 | 1                  | 1                      | 0.71 +/- 0.03    | 0.65 +/- 0.03     | 0.94 +/- 0.03         |
|         |              | MACCS2            | 0.98              | 0.95               | 0.99                   | 0.8 +/- 0.02     | 0.72 +/- 0.02     | 0.91 +/- 0.02         |
|         |              | descriptors       | 1                 | 0.99               | 1                      | 0.73 +/- 0.05    | 0.61 +/- 0.05     | 0.88 +/- 0.02         |
|         |              | ECFP6             | 1                 | 1                  | 1                      | 0.78 +/- 0.03    | 0.7 +/- 0.03      | 0.94 +/- 0.02         |
|         | XGBoost      | ECFP4             | 1                 | 1                  | 1                      | 0.76 +/- 0.05    | 0.69 +/- 0.05     | 0.94 +/- 0.02         |

|  |     |             |      |      |      |               |               |               |
|--|-----|-------------|------|------|------|---------------|---------------|---------------|
|  |     | MACCS2      | 0.98 | 0.95 | 1    | 0.78 +/- 0.04 | 0.7 +/- 0.04  | 0.92 +/- 0.02 |
|  |     | descriptors | 1    | 1    | 1    | 0.79 +/- 0.01 | 0.72 +/- 0.01 | 0.94 +/- 0.01 |
|  |     | ECFP6       | 1    | 1    | 1    | 0.79 +/- 0.04 | 0.72 +/- 0.04 | 0.94 +/- 0.02 |
|  | KNN | ECFP4       | 1    | 1    | 1    | 0.77 +/- 0.05 | 0.7 +/- 0.05  | 0.92 +/- 0.03 |
|  |     | MACCS2      | 0.98 | 0.96 | 1    | 0.73 +/- 0.03 | 0.65 +/- 0.03 | 0.9 +/- 0.02  |
|  |     | descriptors | 0.85 | 0.76 | 0.96 | 0.67 +/- 0.03 | 0.54 +/- 0.03 | 0.86 +/- 0.01 |
|  |     | ECFP6       | 1    | 1    | 1    | 0.77 +/- 0.04 | 0.69 +/- 0.04 | 0.92 +/- 0.03 |
|  | DNN | ECFP4       | 1    | 1    | 1    | 0.8 +/- 0.03  | 0.74 +/- 0.03 | 0.94 +/- 0.03 |
|  |     | MACCS2      | 1    | 1    | 1    | 0.78 +/- 0.03 | 0.74 +/- 0.03 | 0.94 +/- 0.02 |
|  |     | descriptors | 1    | 1    | 1    | 0.8 +/- 0.03  | 0.76 +/- 0.03 | 0.95 +/- 0.02 |
|  |     | ECFP6       | 0.99 | 0.99 | 1    | 0.78 +/- 0.03 | 0.65 +/- 0.03 | 0.93 +/- 0.02 |

**Table S7.** External (test set) validation parameters of the multiclass SIRT1/2 models.

| ML algorithm                                                                      | Molecular feature | BA   | MCC  | ROC_AUC <sup>a</sup> | Precision <sup>a</sup> | Recall <sup>a</sup> | F1 <sup>a</sup> |
|-----------------------------------------------------------------------------------|-------------------|------|------|----------------------|------------------------|---------------------|-----------------|
| RF                                                                                | descriptors       | 0.85 | 0.77 | 0.96                 | 0.84                   | 0.85                | 0.84            |
|                                                                                   | ECFP4             | 0.84 | 0.74 | 0.96                 | 0.81                   | 0.84                | 0.82            |
|                                                                                   | MACCS2            | 0.82 | 0.72 | 0.95                 | 0.81                   | 0.82                | 0.81            |
|                                                                                   | ECFP6             | 0.83 | 0.74 | 0.96                 | 0.81                   | 0.83                | 0.82            |
| SVC                                                                               | descriptors       | 0.86 | 0.79 | 0.96                 | 0.85                   | 0.86                | 0.86            |
|                                                                                   | ECFP4             | 0.83 | 0.73 | 0.95                 | 0.81                   | 0.83                | 0.82            |
|                                                                                   | MACCS2            | 0.82 | 0.72 | 0.94                 | 0.8                    | 0.82                | 0.81            |
|                                                                                   | ECFP6             | 0.8  | 0.7  | 0.95                 | 0.8                    | 0.8                 | 0.8             |
| XGBoost                                                                           | descriptors       | 0.84 | 0.76 | 0.95                 | 0.83                   | 0.84                | 0.84            |
|                                                                                   | ECFP4             | 0.84 | 0.74 | 0.96                 | 0.82                   | 0.84                | 0.83            |
|                                                                                   | MACCS2            | 0.83 | 0.73 | 0.95                 | 0.81                   | 0.83                | 0.82            |
|                                                                                   | ECFP6             | 0.81 | 0.71 | 0.95                 | 0.79                   | 0.82                | 0.8             |
| KNN                                                                               | descriptors       | 0.8  | 0.69 | 0.93                 | 0.78                   | 0.8                 | 0.79            |
|                                                                                   | ECFP4             | 0.84 | 0.73 | 0.94                 | 0.82                   | 0.84                | 0.82            |
|                                                                                   | MACCS2            | 0.84 | 0.75 | 0.94                 | 0.82                   | 0.84                | 0.83            |
|                                                                                   | ECFP6             | 0.83 | 0.71 | 0.93                 | 0.81                   | 0.83                | 0.81            |
| DNN                                                                               | descriptors       | 0.84 | 0.77 | 0.93                 | 0.84                   | 0.84                | 0.84            |
|                                                                                   | ECFP4             | 0.82 | 0.77 | 0.94                 | 0.84                   | 0.82                | 0.83            |
|                                                                                   | MACCS2            | 0.82 | 0.73 | 0.92                 | 0.81                   | 0.82                | 0.81            |
|                                                                                   | ECFP6             | 0.84 | 0.74 | 0.95                 | 0.82                   | 0.84                | 0.82            |
| <sup>a</sup> Values are calculated using macro averages and one-vs-rest approach. |                   |      |      |                      |                        |                     |                 |

**Table S8.** The predictive performance parameters of the multiclass SIRT1/2 models on the decoys dataset.

| ML algorithm                                                                      | Molecular feature | BA                  | MCC                | ROC_AUC <sub>a</sub> | Precision <sub>a</sub> | Recall <sub>a</sub> | F1 <sup>a</sup>     |
|-----------------------------------------------------------------------------------|-------------------|---------------------|--------------------|----------------------|------------------------|---------------------|---------------------|
| RF                                                                                | descriptors       | 0.72                | 0.09               | 0.91                 | 0.35                   | 0.72                | 0.24                |
|                                                                                   | ECFP4             | 0.82<br>(0.88)<br>* | 0.2<br>(0.73)<br>* | 0.92<br>(0.95)*      | 0.37<br>(0.72)*        | 0.82<br>(0.89)*     | 0.37<br>(0.79)<br>* |
|                                                                                   | MACCS2            | 0.71                | 0.09               | 0.89                 | 0.35                   | 0.71                | 0.25                |
|                                                                                   | ECFP6             | 0.8                 | 0.16               | 0.91                 | 0.36                   | 0.8                 | 0.34                |
| SVC                                                                               | descriptors       | 0.68                | 0.08               | 0.92                 | 0.35                   | 0.68                | 0.19                |
|                                                                                   | ECFP4             | 0.7                 | 0.09               | 0.9                  | 0.35                   | 0.7                 | 0.23                |
|                                                                                   | MACCS2            | 0.72                | 0.1                | 0.9                  | 0.35                   | 0.72                | 0.26                |
|                                                                                   | ECFP6             | 0.69                | 0.08               | 0.91                 | 0.35                   | 0.69                | 0.22                |
| XGBoost                                                                           | descriptors       | 0.71                | 0.09               | 0.89                 | 0.34                   | 0.71                | 0.22                |
|                                                                                   | ECFP4             | 0.75                | 0.12               | 0.93                 | 0.35                   | 0.75                | 0.28                |
|                                                                                   | MACCS2            | 0.7                 | 0.09               | 0.89                 | 0.34                   | 0.7                 | 0.24                |
|                                                                                   | ECFP6             | 0.73                | 0.11               | 0.91                 | 0.35                   | 0.73                | 0.28                |
| KNN                                                                               | descriptors       | 0.62                | 0.06               | 0.7                  | 0.34                   | 0.62                | 0.17                |
|                                                                                   | ECFP4             | 0.69                | 0.08               | 0.81                 | 0.34                   | 0.69                | 0.22                |
|                                                                                   | MACCS2            | 0.65                | 0.07               | 0.76                 | 0.34                   | 0.65                | 0.17                |
|                                                                                   | ECFP6             | 0.67                | 0.08               | 0.81                 | 0.34                   | 0.67                | 0.21                |
| DNN                                                                               | descriptors       | 0.7                 | 0.09               | 0.71                 | 0.35                   | 0.7                 | 0.22                |
|                                                                                   | ECFP4             | 0.67                | 0.08               | 0.87                 | 0.34                   | 0.67                | 0.22                |
|                                                                                   | MACCS2            | 0.67                | 0.08               | 0.74                 | 0.34                   | 0.67                | 0.21                |
|                                                                                   | ECFP6             | 0.68                | 0.08               | 0.87                 | 0.34                   | 0.68                | 0.21                |
| <sup>a</sup> Values are calculated using macro averages and one-vs-rest approach. |                   |                     |                    |                      |                        |                     |                     |
| * Values in brackets are obtained after applicability domain corrections.         |                   |                     |                    |                      |                        |                     |                     |

**Table S9.** External (test set) validation parameters of the multiclass SIRT2/3 models.

| ML algorithm                                                                      | Molecular feature | BA   | MCC  | ROC_AUC <sup>a</sup> | Precision <sup>a</sup> | Recall <sup>a</sup> | F1 <sup>a</sup> |
|-----------------------------------------------------------------------------------|-------------------|------|------|----------------------|------------------------|---------------------|-----------------|
| RF                                                                                | descriptors       | 0.9  | 0.83 | 0.97                 | 0.87                   | 0.9                 | 0.88            |
|                                                                                   | ECFP4             | 0.83 | 0.73 | 0.96                 | 0.8                    | 0.83                | 0.81            |
|                                                                                   | MACCS2            | 0.85 | 0.75 | 0.95                 | 0.82                   | 0.85                | 0.84            |
|                                                                                   | ECFP6             | 0.83 | 0.74 | 0.95                 | 0.8                    | 0.83                | 0.81            |
| SVC                                                                               | descriptors       | 0.94 | 0.88 | 0.98                 | 0.91                   | 0.94                | 0.92            |
|                                                                                   | ECFP4             | 0.77 | 0.71 | 0.97                 | 0.83                   | 0.78                | 0.8             |
|                                                                                   | MACCS2            | 0.85 | 0.74 | 0.95                 | 0.81                   | 0.85                | 0.83            |
|                                                                                   | ECFP6             | 0.82 | 0.74 | 0.95                 | 0.82                   | 0.82                | 0.82            |
| XGBoost                                                                           | descriptors       | 0.88 | 0.81 | 0.97                 | 0.86                   | 0.88                | 0.87            |
|                                                                                   | ECFP4             | 0.84 | 0.73 | 0.96                 | 0.81                   | 0.85                | 0.82            |
|                                                                                   | MACCS2            | 0.87 | 0.77 | 0.95                 | 0.84                   | 0.87                | 0.85            |
|                                                                                   | ECFP6             | 0.8  | 0.71 | 0.96                 | 0.79                   | 0.81                | 0.8             |
| KNN                                                                               | descriptors       | 0.85 | 0.73 | 0.96                 | 0.8                    | 0.85                | 0.82            |
|                                                                                   | ECFP4             | 0.85 | 0.74 | 0.93                 | 0.8                    | 0.85                | 0.82            |
|                                                                                   | MACCS2            | 0.85 | 0.73 | 0.93                 | 0.8                    | 0.85                | 0.82            |
|                                                                                   | ECFP6             | 0.85 | 0.73 | 0.93                 | 0.79                   | 0.85                | 0.82            |
| DNN                                                                               | descriptors       | 0.94 | 0.89 | 0.97                 | 0.92                   | 0.94                | 0.93            |
|                                                                                   | ECFP4             | 0.84 | 0.75 | 0.95                 | 0.81                   | 0.84                | 0.83            |
|                                                                                   | MACCS2            | 0.87 | 0.78 | 0.95                 | 0.83                   | 0.87                | 0.85            |
|                                                                                   | ECFP6             | 0.88 | 0.81 | 0.97                 | 0.85                   | 0.88                | 0.86            |
| <sup>a</sup> Values are calculated using macro averages and one-vs-rest approach. |                   |      |      |                      |                        |                     |                 |

**Table S10.** The predictive performance parameters of the multiclass SIRT2/3 models on the decoys dataset.

| ML algorithm                                                                      | Molecular feature | BA                  | MCC                 | ROC_AUC <sub>a</sub> | Precision <sub>a</sub> | Recall <sub>a</sub> | F1 <sup>a</sup>     |
|-----------------------------------------------------------------------------------|-------------------|---------------------|---------------------|----------------------|------------------------|---------------------|---------------------|
| RF                                                                                | descriptors       | 0.66<br>(0.59)<br>* | 0.06<br>(0.12)<br>* | 0.93<br>(0.88)*      | 0.34<br>(0.47)*        | 0.66<br>(0.59)*     | 0.14<br>(0.34)<br>* |
|                                                                                   | ECFP4             | 0.59                | 0.08                | 0.91                 | 0.34                   | 0.59                | 0.27                |
|                                                                                   | MACCS2            | 0.65                | 0.06                | 0.92                 | 0.34                   | 0.65                | 0.17                |
|                                                                                   | ECFP6             | 0.62                | 0.08                | 0.92                 | 0.34                   | 0.62                | 0.25                |
| SVC                                                                               | descriptors       | 0.62                | 0.06                | 0.95                 | 0.34                   | 0.62                | 0.02                |
|                                                                                   | ECFP4             | 0.54                | 0.04                | 0.92                 | 0.32                   | 0.54                | 0.06                |
|                                                                                   | MACCS2            | 0.58                | 0.05                | 0.93                 | 0.34                   | 0.58                | 0.08                |
|                                                                                   | ECFP6             | 0.62                | 0.05                | 0.92                 | 0.34                   | 0.62                | 0.11                |
| XGBoost                                                                           | descriptors       | 0.7                 | 0.07                | 0.92                 | 0.34                   | 0.7                 | 0.19                |
|                                                                                   | ECFP4             | 0.61                | 0.07                | 0.91                 | 0.35                   | 0.61                | 0.17                |
|                                                                                   | MACCS2            | 0.69                | 0.07                | 0.92                 | 0.34                   | 0.69                | 0.21                |
|                                                                                   | ECFP6             | 0.63                | 0.07                | 0.92                 | 0.35                   | 0.63                | 0.17                |
| KNN                                                                               | descriptors       | 0.64                | 0.05                | 0.71                 | 0.34                   | 0.64                | 0.15                |
|                                                                                   | ECFP4             | 0.66                | 0.06                | 0.74                 | 0.34                   | 0.66                | 0.17                |
|                                                                                   | MACCS2            | 0.61                | 0.04                | 0.66                 | 0.34                   | 0.61                | 0.12                |
|                                                                                   | ECFP6             | 0.65                | 0.06                | 0.73                 | 0.34                   | 0.65                | 0.16                |
| DNN                                                                               | descriptors       | 0.72<br>(0.72)<br>* | 0.07<br>(0.1)*      | 0.87<br>(0.87)*      | 0.34<br>(0.34)*        | 0.72<br>(0.75)*     | 0.18<br>(0.2)*      |
|                                                                                   | ECFP4             | 0.65                | 0.06                | 0.87                 | 0.34                   | 0.65                | 0.16                |
|                                                                                   | MACCS2            | 0.67                | 0.06                | 0.87                 | 0.34                   | 0.67                | 0.18                |
|                                                                                   | ECFP6             | 0.63                | 0.06                | 0.8                  | 0.34                   | 0.63                | 0.1                 |
| <sup>a</sup> Values are calculated using macro averages and one-vs-rest approach. |                   |                     |                     |                      |                        |                     |                     |
| * Values in brackets are obtained after applicability domain corrections.         |                   |                     |                     |                      |                        |                     |                     |

**Table S11.** Utility SIRT2i\_Predictor for the processing of the previously published structure-based virtual screening results[20].

| ID      | SMILES                                                               | Activity (Inh% or IC50 (μM)) <sup>a</sup> | SIRT2 activity according to criteria of this work | Binary model predictions <sup>b</sup> | Predicted probability (binary model) <sup>c</sup> |
|---------|----------------------------------------------------------------------|-------------------------------------------|---------------------------------------------------|---------------------------------------|---------------------------------------------------|
| NDJ134* | <chem>CCN1C(=O)c2cccc3c(S(=O)(=O)NCCc4cccc4)cc1c23</chem>            | 70.2%*                                    | Twilight zone                                     | Outside AD                            | 0.455224                                          |
| NDJ18   | <chem>O=C(CCC1CCCC1)Nc1ccc(Cc2ccncc2)cc1</chem>                      | 58.7 μM                                   | Twilight zone                                     | No                                    | 0.354493                                          |
| NDJ85   | <chem>Cc1cccc1C(=O)NC(=S)NCc1ccc(-c2nn3c(C)nnc3s2)cc1</chem>         | 85.9 μM                                   | Twilight zone                                     | Outside AD                            | 0.555415                                          |
| NDJ11   | <chem>Cc1cccc1OCC(=O)Nc1ccc(Oc2ccc3c(c2)C(=O)NC3=O)cc1</chem>        | 55.6%                                     | Twilight zone                                     | No                                    | 0.383697                                          |
| NDJ57   | <chem>Cc1nnc2sc(-c3ccc(CNC(=O)c4ccc(-c5ccc(Cl)cc5)o4)cc3)nn12</chem> | 47.2%                                     | Twilight zone                                     | Outside AD                            | 0.415945                                          |
| NDJ20   | <chem>O=C(NCCc1cccc1)c1ccc(NC(=O)c2cc(-n3cnnc3)ccc2Cl)cc1</chem>     | 45.1%                                     | Twilight zone                                     | No                                    | 0.335031                                          |
| NDJ10   | <chem>Cc1ccc(C)c(SCCc2nn3c(Cc4cccc4F)nnc3s2)c1</chem>                | 40.5%                                     | Twilight zone                                     | Outside AD                            | 0.549759                                          |
| NDJ4    | <chem>Cc1cc(=O)oc2cc(OC[C@H](O)Cn3c(C)nc4cccc43)ccc12</chem>         | 31.8%                                     | Inactive                                          | Outside AD                            | 0.518789                                          |
| NDJ26   | <chem>O=C1Nc2ccc(S(=O)(=O)N3CCN(c4cccc4)CC3)c3cccc1c23</chem>        | 30.0%                                     | Inactive                                          | No                                    | 0.391046                                          |

<sup>a</sup> Inh% assays were performed at compounds concentration of 200 μM.

<sup>b</sup> No – not predicted to be active SIRT2 inhibitor; Yes – Predicted to be active SIRT2 inhibitor. For definition of “active” class see the Manuscript.

<sup>c</sup> The predicted probability for “active” class prediction could be between 0 and 1. If between 0.4 – 0.6, it is considered outside applicability domain (AD).

\* Compound interfered with the fluorescent assay.

**Table S12.** Results of *in vitro* evaluation of the in-house compounds.

| ID                | SMILES                                                                                    | Activity (Inh% <sup>a</sup> ) | SIRT2 activity according to criteria of this work | Binary model predictions <sup>b</sup> | Predicted probability (binary model) <sup>c</sup> |
|-------------------|-------------------------------------------------------------------------------------------|-------------------------------|---------------------------------------------------|---------------------------------------|---------------------------------------------------|
| 316               | <chem>COc1ccc([C@H]2Cc3cc(OC4O[C@H](CO)[C@@H](O)[C@H](O)[C@H]4O)cc(O)c3C(=O)O2)cc1</chem> | 28.2%                         | Inactive                                          | Outside AD                            | 0.473878                                          |
| 1024*             | /†                                                                                        | 48.7% *                       | Twilight zone                                     | No                                    | 0.294624                                          |
| 1558 <sup>3</sup> | <chem>COc1ccc(Cn2cnc3c(Cl)nccc32)cc1</chem>                                               | 51.1%                         | Twilight zone                                     | No                                    | 0.34941                                           |
| 1657 <sup>4</sup> | <chem>COc1ccc(CN2NC([N+](=O)[O-])c3ccnc(NC4CCCC4)c32)cc1</chem>                           | 59.7%                         | Twilight zone                                     | Outside AD                            | 0.427429                                          |
| Ex-527            | <chem>NC(=O)C1CCCc2c1[nH]c1ccc(Cl)cc21</chem>                                             | 89.6%                         | Active                                            | Yes                                   | 0.830218                                          |

<sup>a</sup> Inh% assays were performed at compounds concentration of 200 μM.  
<sup>b</sup> No – not predicted to be active SIRT2 inhibitor; Yes – Predicted to be active SIRT2 inhibitor. For definition of “active” class see the Manuscript.  
<sup>c</sup> The predicted probability for “active” class prediction could be between 0 and 1. If between 0.4 – 0.6, it is considered outside applicability domain (AD).  
\* Compound tested at 100 μM due to assay interference.  
† The compound structure is available upon request since synthesis is yet to be published.

### Supplementary Note S1 – Internal validation parameters

Following formula were used for calculation of internal validation parameters:

$$R_{int}^2 = 1 - \frac{\sum_{i=1}^{n_{int}} (y_i - \hat{y}_i)^2}{\sum_{i=1}^{n_{int}} (y_i - \bar{y})^2} \quad (1)$$

$$RMSE_{int} = \sqrt{\frac{\sum_{i=1}^{n_{int}} (y_i - \hat{y}_i)^2}{n_{int}}} \quad (2)$$

$$Q^2 = 1 - \frac{\sum_{i=1}^n (y_i - \hat{y}_{i/i})^2}{\sum_{i=1}^n (y_i - \bar{y})^2} \quad (3)$$

$$RMSE_{CV} = \sqrt{\frac{\sum_{i=1}^n (y_i - \hat{y}_{i/i})^2}{n}} \quad (4)$$

Where  $y_i$  represents experimental data values;  $\hat{y}_i$  represents predicted data values;  $\hat{y}_{i/i}$  response of the i-th object estimated by using a model obtained without using the i-th; n - number of objects.

For binary classification models, Matthews correlation coefficient (MCC) was calculated according to the equation (5):

$$MCC = \frac{(TP \times TN) - (FP \times FN)}{\sqrt{(TP+FP) \times (TP+FN) \times (TN+FP) \times (TN+FN)}} \quad (5)$$

Where  $TP$  stands for number of true positive predictions,  $TN$  stands for number of true negative predictions,  $FP$  stands for number of false positive predictions and  $FN$  stands for number of false negative predictions.

### Supplementary Note S2 - Supplementary methods

**In vitro enzymatic assays for SIRT2.** Deacetylation activities of SIRT2 in presence of in-house compounds were determined using previously described protocol for Fluor de Lys fluorometric assays (Enzo Life Sciences, Ann Arbor, MI, USA)[68]. Briefly, the reaction was started by incubating the enzyme (SIRT2) with the reaction mixture of acetylated peptide substrate BioMol KI179 for SIRT2 (0.7 Km: 198  $\mu$ M for SIRT2),  $NAD^+$  (0.9 Km: 547  $\mu$ M for SIRT2), and 5% dimethyl sulfoxide (DMSO) or compounds in 5% final DMSO concentration. Incubation was done at 37 °C, for 1 hour. The developer and nicotinamide (2 mM in histone deacetylase (HDAC) assay buffer in total volume of 50  $\mu$ l) were added and the incubation was continued for 45 min at 37 °C. The fluorescence was measured using EnVision 2104 Multilabel Reader (PerkinElmer, Waltham, MA, USA) with excitation and emission wavelengths of 370 nm and 460 nm, respectively. All

experiments were performed in triplicates. Compounds were screened on SIRT2 inhibitory activity at 200  $\mu$ M to obtain percent of inhibition.
